# Supplementary material for: Characterizing the Crosstalk of NCAPG with Tumor Microenvironment and Tumor Stemness in Stomach Adenocarcinoma
Source: Hindawi journal article supplement (doi:10.1155/2022/1888358), 2022-10-03

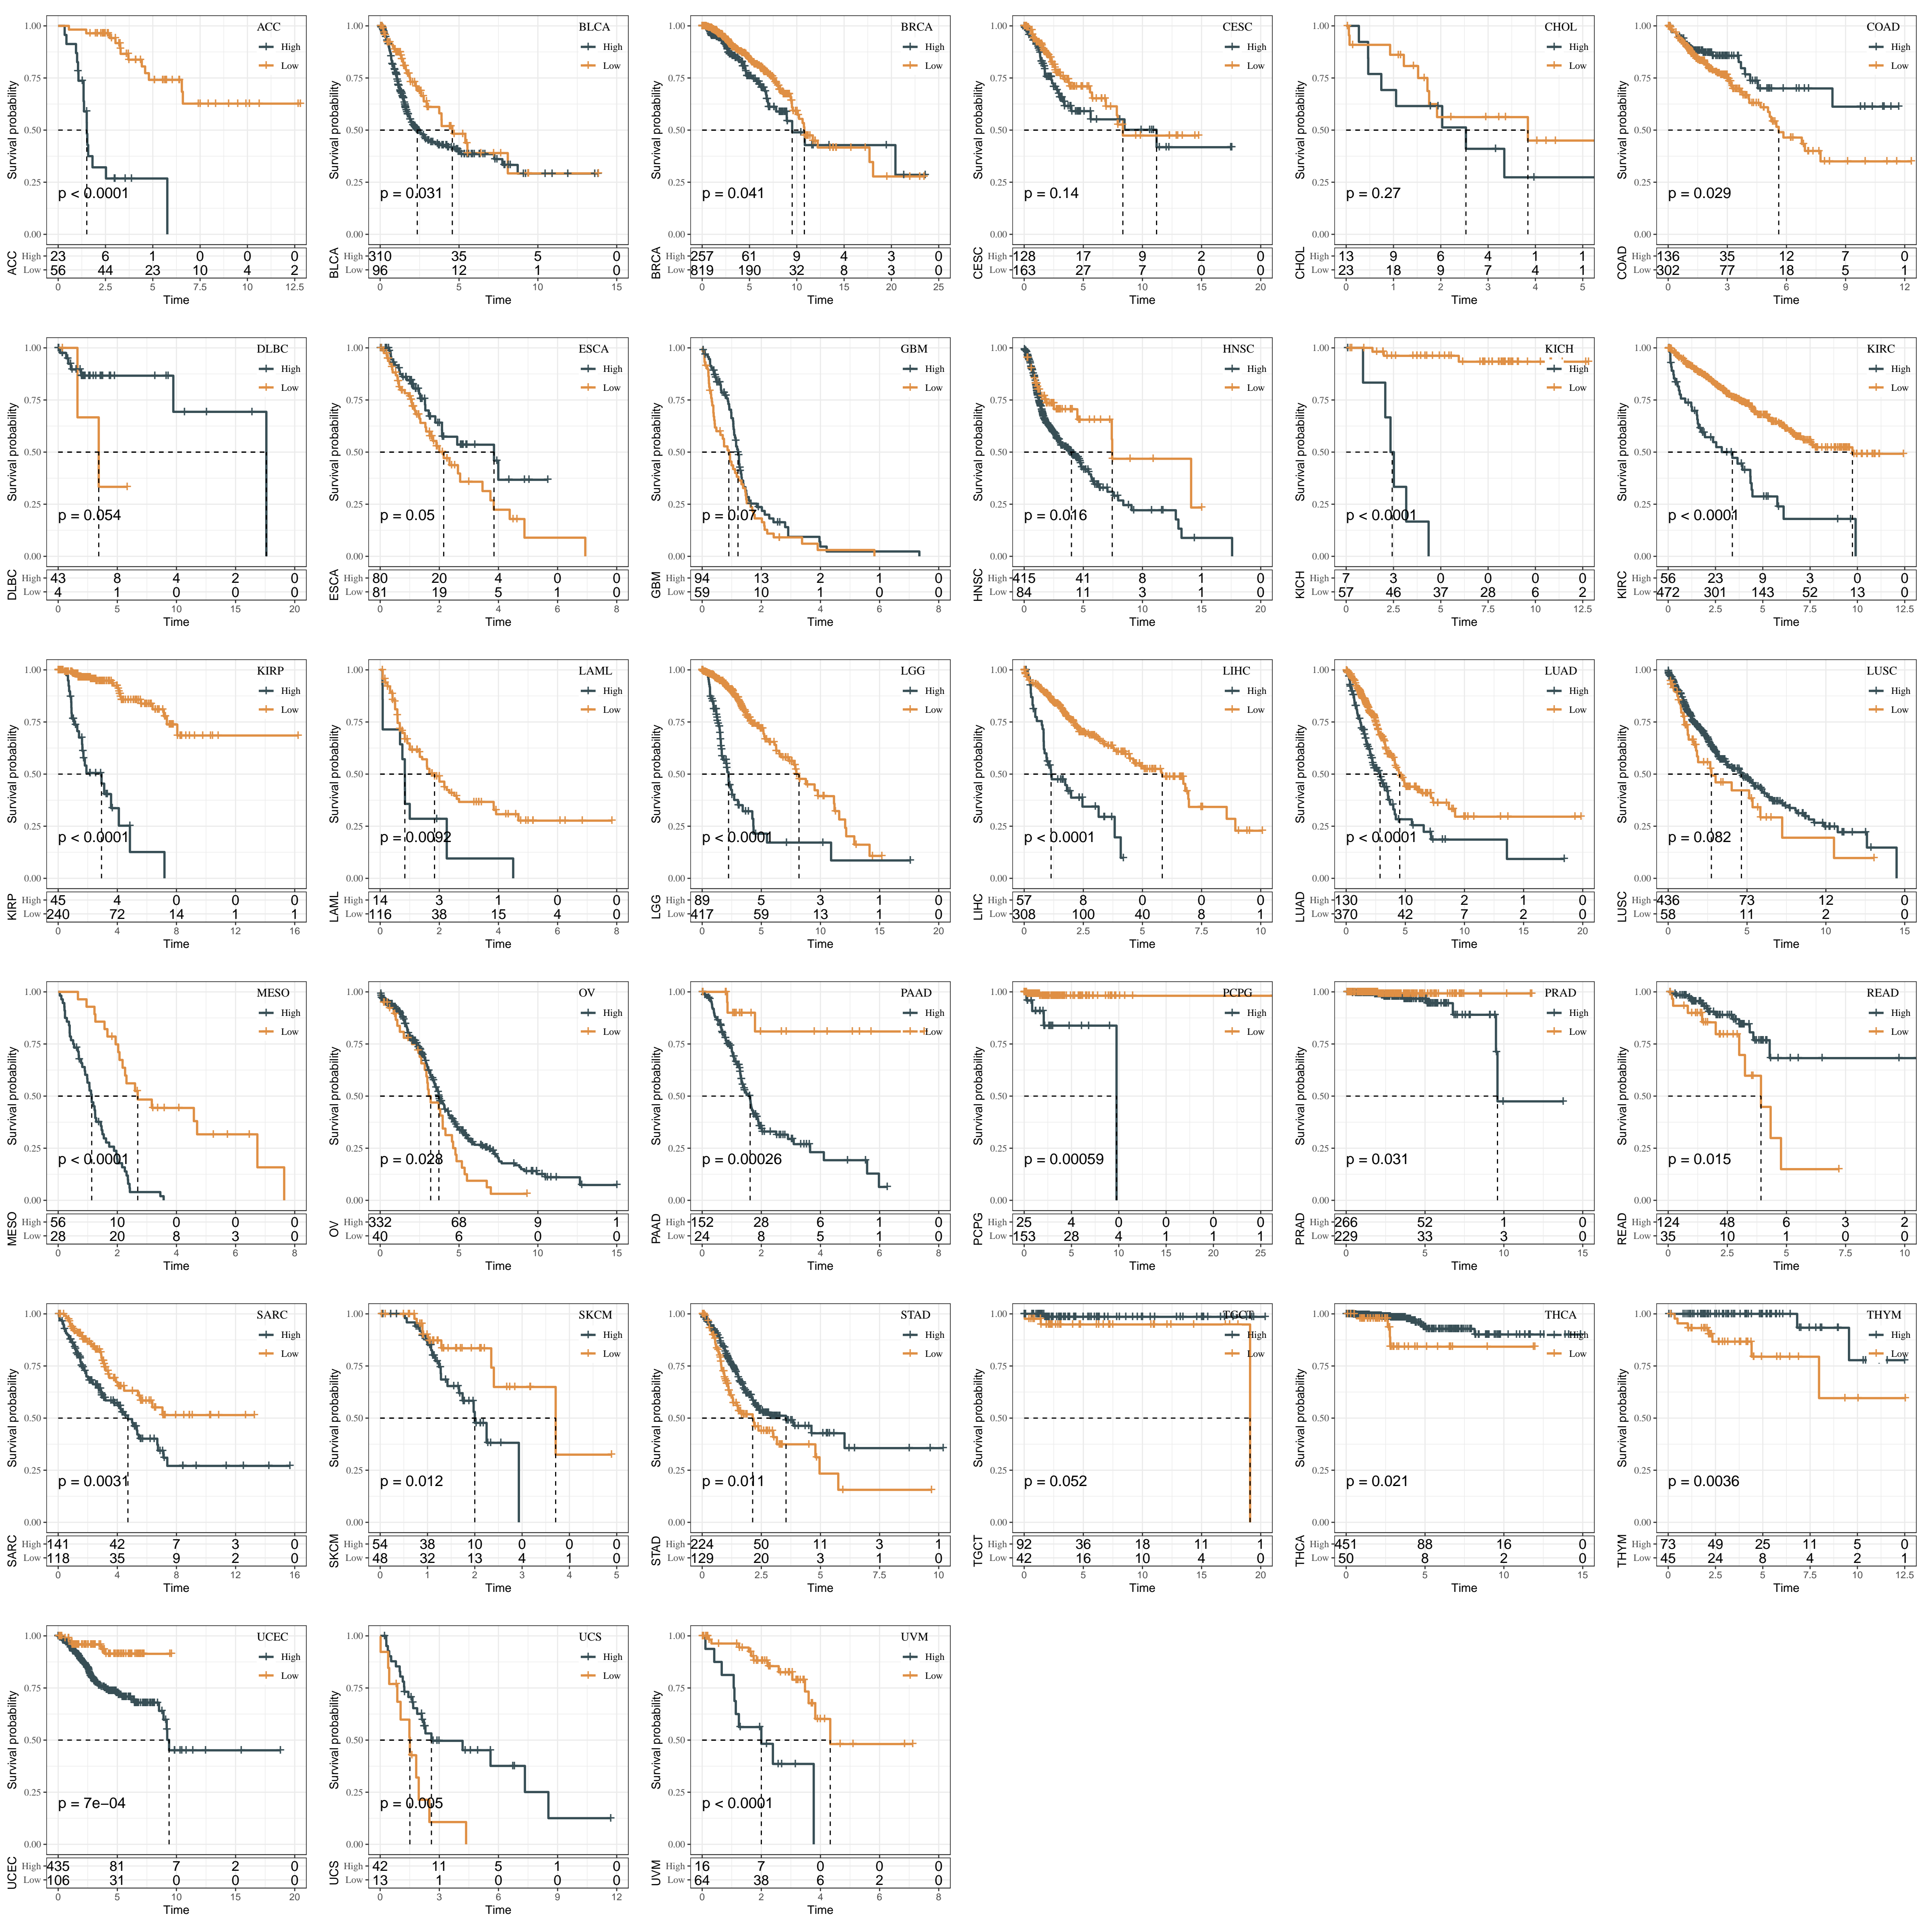

Supplement: f1 [file 1888358.f1.pdf]
