# Supplementary material for: Characterizing the Crosstalk of NCAPG with Tumor Microenvironment and Tumor Stemness in Stomach Adenocarcinoma
Source: Hindawi journal article supplement (doi:10.1155/2022/1888358), 2022-10-03

**A**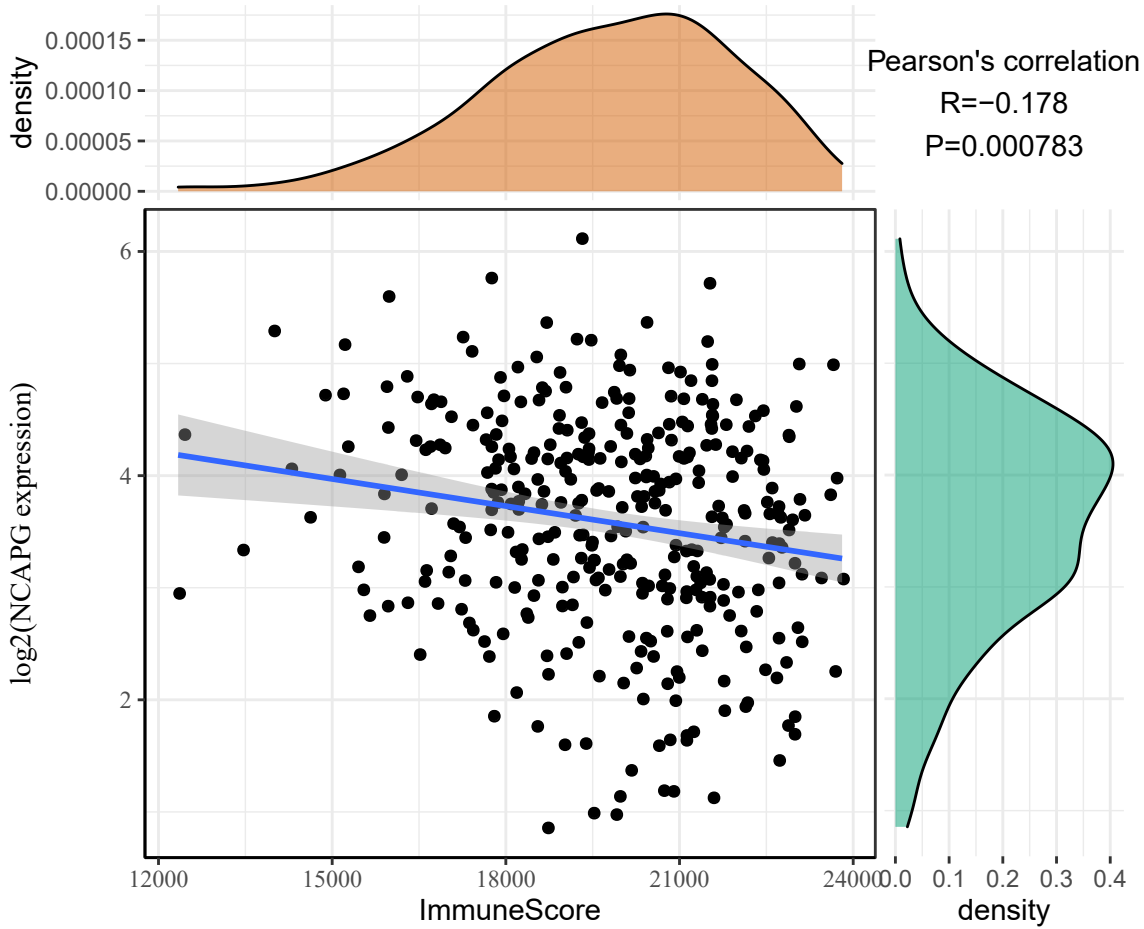**B**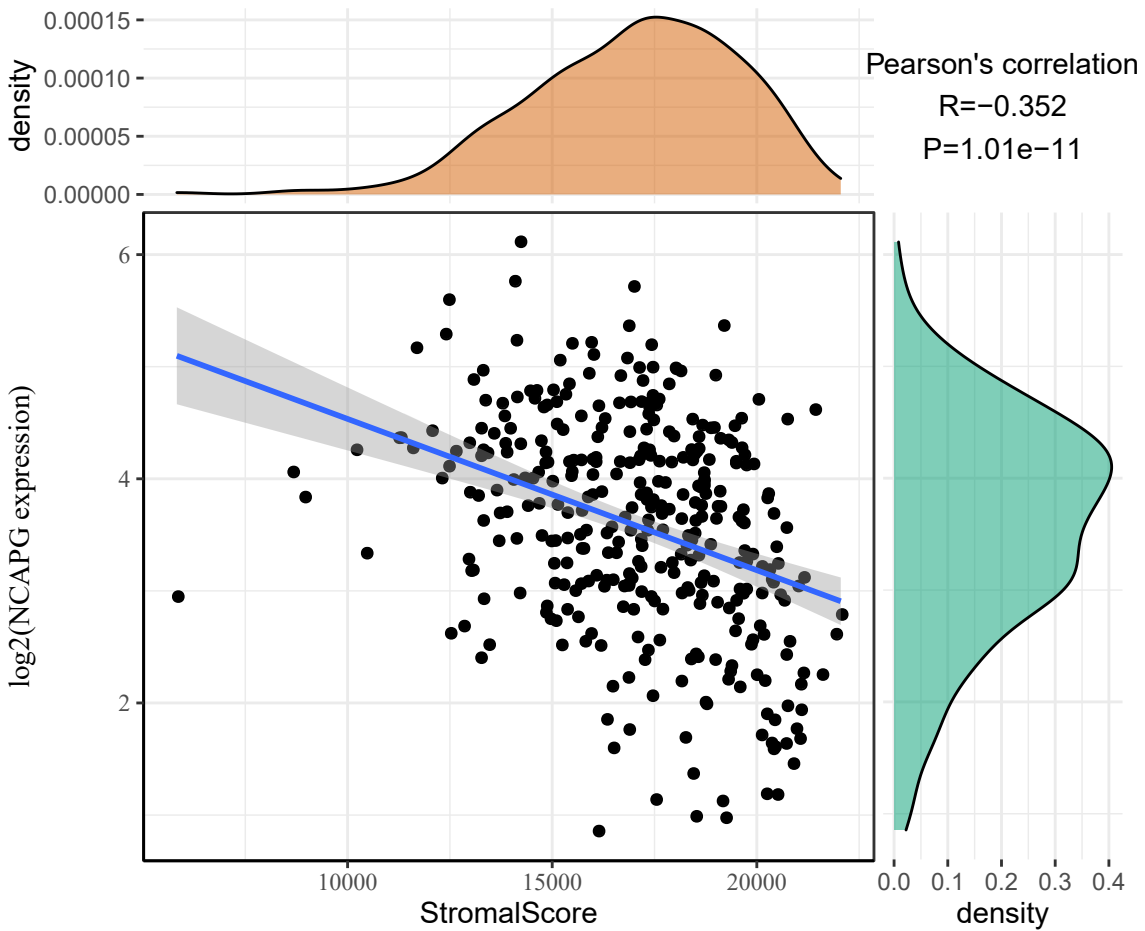

Supplement: f2 [file 1888358.f2.pdf]
